# Supplementary material for: Sensitivity of Mitochondrial Transcription and Resistance of RNA Polymerase II Dependent Nuclear Transcription to Antiviral Ribonucleosides
Source: PLoS Pathog. 2012 Nov 15;8(11):e1003030. doi: 10.1371/journal.ppat.1003030 (PMC3499576; doi:10.1371/journal.ppat.1003030)
Supplement: Figure S3 — Kinetic parameters for POLRMT-catalyzed nucleotide incorporation: Guanine and uridine analogs. Kinetics of nucleotide incorporation as a function of nucleoside triphosphate concentration for (A) GTP, (B) 2′-C-methyl-GTP, (C) UTP and (D) 2′-deoxy-2′-fluoro-2′-C-methyl-UTP. Observed rate constants (k obs) for nucleotidyl transfer at various concentrations of nucleotide substrate were obtained by fitting either product-versus-time data or relative fluorescence-versus-time data to an equation defining a single exponential. Values for kobs were then plotted as a function of nucleoside triphosphate concentration and fit to a hyperbola, yielding the maximal rate constant for incorporation (kpol) and apparent dissociation constant (Kd,app). (PDF) [file ppat.1003030.s003.pdf]

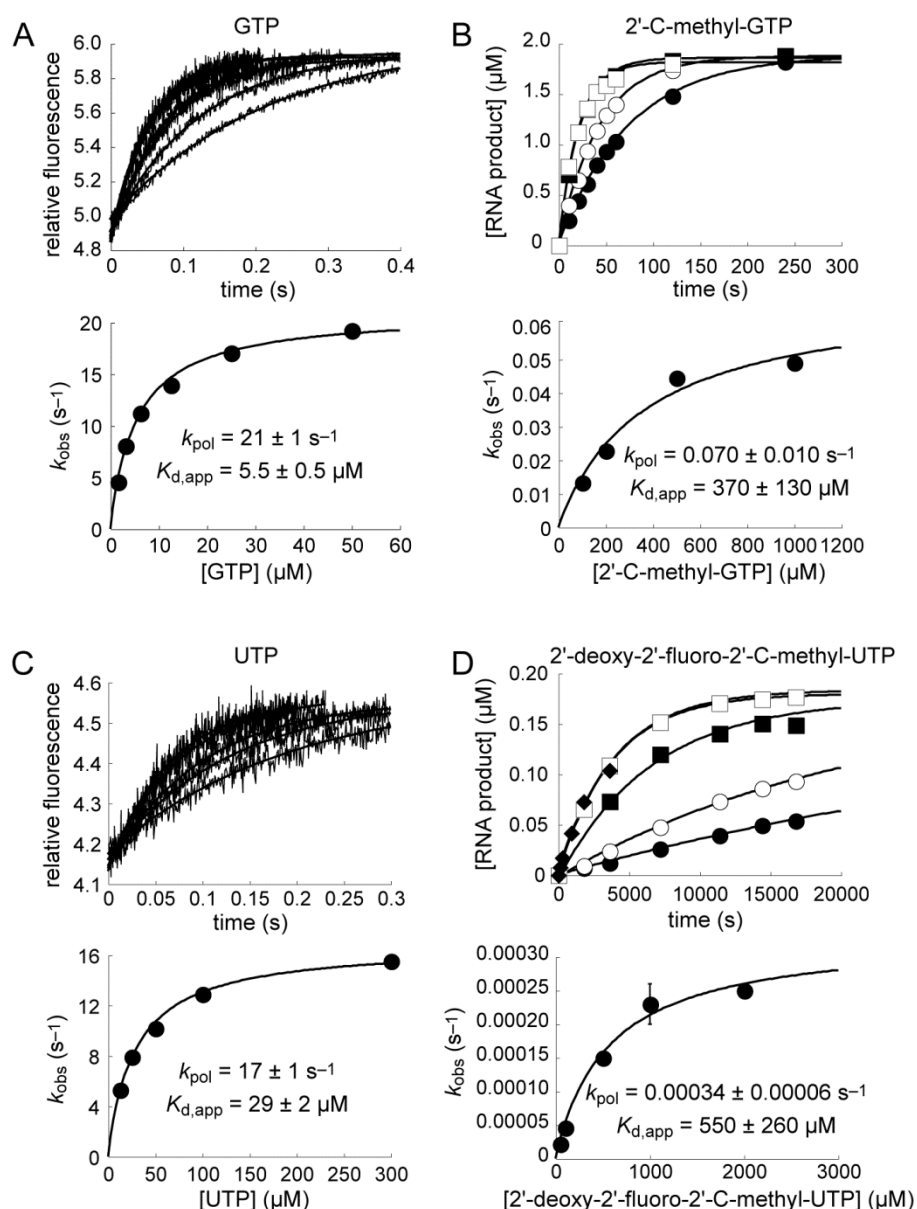

**Figure S3. Kinetic Parameters for POLRMT-Catalyzed Nucleotide Incorporation: Guanine and Uridine Analogs.** (A) Correct GMP incorporation. POLRMT (0.125 μM) was incubated with 8 bp 2AP scaffold (0.1 μM) for 3 min and then rapidly mixed with GTP (1.56, 3.12, 6.25, 12.5, 25 or 50 μM) using a stopped-flow. The observed change in fluorescence emission was measured and fit to a single exponential (Eq. 1), yielding  $k_{obs}$  values of  $4.6 \pm 0.1$ ,  $8.0 \pm 0.1$ ,  $11.5 \pm 0.1$ ,  $14.0 \pm 0.2$ ,  $17.1 \pm 0.2$  and  $19.0 \pm 0.2$  s<sup>-1</sup> for 1.56, 3.12, 6.25, 12.5, 25 or 50 μM GTP, respectively. Values for  $k_{obs}$  were plotted as a function of GTP concentration and fit to a hyperbola (Eq. 2), yielding a  $k_{pol}$  value of  $21 \pm 1$  s<sup>-1</sup> and a  $K_{d,app}$  value of  $5.5 \pm 0.5$  μM. (B) 2'-C-methyl-GMP misincorporation. POLRMT (3.6 μM) was incubated with 5'-<sup>32</sup>P-labeled-RNA/DNA 8 bp scaffold (2 μM) for 3 min and then rapidly mixed with 2'-C-methyl-GTP (100, 200, 500 or 1000 μM). Reactions were quenched at various times with EDTA (300 mM). Quantitated RNA product was plotted as a function of time and fit to a single exponential (Eq. 1) yielding values for  $k_{obs}$  of  $0.013 \pm 0.001$ ,  $0.023 \pm 0.001$ ,  $0.045 \pm 0.002$  and  $0.049 \pm 0.005$  s<sup>-1</sup> for 100 (●), 200 (○) 500 (■) or 1000 (□) μM 2'-C-methyl-GTP, respectively. Values for  $k_{obs}$  were plotted as a function of 2'-C-methyl-CTP concentration and fit to a hyperbola (Eq. 2), yielding a  $k_{pol}$  value of  $0.070 \pm 0.010$  s<sup>-1</sup> and a  $K_{d,app}$  value of  $370 \pm 130$  μM. (C) Correct UMP incorporation. POLRMT (0.125 μM) was incubated with 8 bp 2AP scaffold (0.1 μM) for 3 min and then rapidly mixed with UTP (12.5, 25, 50, 100 or 300

$\mu\text{M}$ ) using a stopped-flow. The observed change in fluorescence emission was measured and fit to a single exponential (Eq. 1), yielding  $k_{\text{obs}}$  values of  $5.3 \pm 0.2$ ,  $7.9 \pm 0.2$ ,  $10.2 \pm 0.3$ ,  $12.9 \pm 0.4$  and  $15.5 \pm 0.5 \text{ s}^{-1}$  for 12.5, 25, 50, 100 or 300  $\mu\text{M}$  UTP, respectively. Values for  $k_{\text{obs}}$  were plotted as a function of UTP concentration and fit to a hyperbola (Eq. 2), yielding a  $k_{\text{pol}}$  value of  $17 \pm 1 \text{ s}^{-1}$  and a  $K_{\text{d,app}}$  value of  $29 \pm 2 \mu\text{M}$ . **(D)** 2'-deoxy-2'-fluoro-2'-C-methyl-UMP misincorporation. POLRMT (0.5  $\mu\text{M}$ ) was incubated with 5'- $^{32}\text{P}$ -labeled-RNA/DNA 8 bp scaffold (0.2  $\mu\text{M}$ ) for 3 min and then rapidly mixed with 2'-deoxy-2'-fluoro-2'-C-methyl-UTP (100, 200, 500, 1000 or 2000  $\mu\text{M}$ ). Reactions were quenched at various times with EDTA (300 mM). Quantitated RNA product was plotted as a function of time and fit to a single exponential (Eq. 1) yielding values for  $k_{\text{obs}}$  of  $2.2 \pm 0.2 \times 10^{-5}$ ,  $4.6 \pm 0.2 \times 10^{-5}$ ,  $1.5 \pm 0.2 \times 10^{-4}$ ,  $2.6 \pm 0.3 \times 10^{-4}$  and  $2.5 \pm 0.2 \times 10^{-4} \text{ s}^{-1}$  for 100 (●), 200 (○) 500 (■), 1000 (□) or 2000 (◆)  $\mu\text{M}$  2'-deoxy-2'-fluoro-2'-C-methyl-UTP, respectively. Values for  $k_{\text{obs}}$  were plotted as a function of 2'-deoxy-2'-fluoro-2'-C-methyl-UTP concentration and fit to a hyperbola (Eq. 2), yielding a  $k_{\text{pol}}$  value of  $3.4 \pm 0.6 \times 10^{-4} \text{ s}^{-1}$  and a  $K_{\text{d,app}}$  value of  $550 \pm 260 \mu\text{M}$ .
