# Supplementary material for: Sensitivity of Mitochondrial Transcription and Resistance of RNA Polymerase II Dependent Nuclear Transcription to Antiviral Ribonucleosides
Source: PLOS journal article supplement (doi:10.1371/journal.ppat.1003030), 2012-11-15
Supplement: S1 (10.1371/journal.ppat.1003030.s001) [file journal.ppat.1003030.s001]

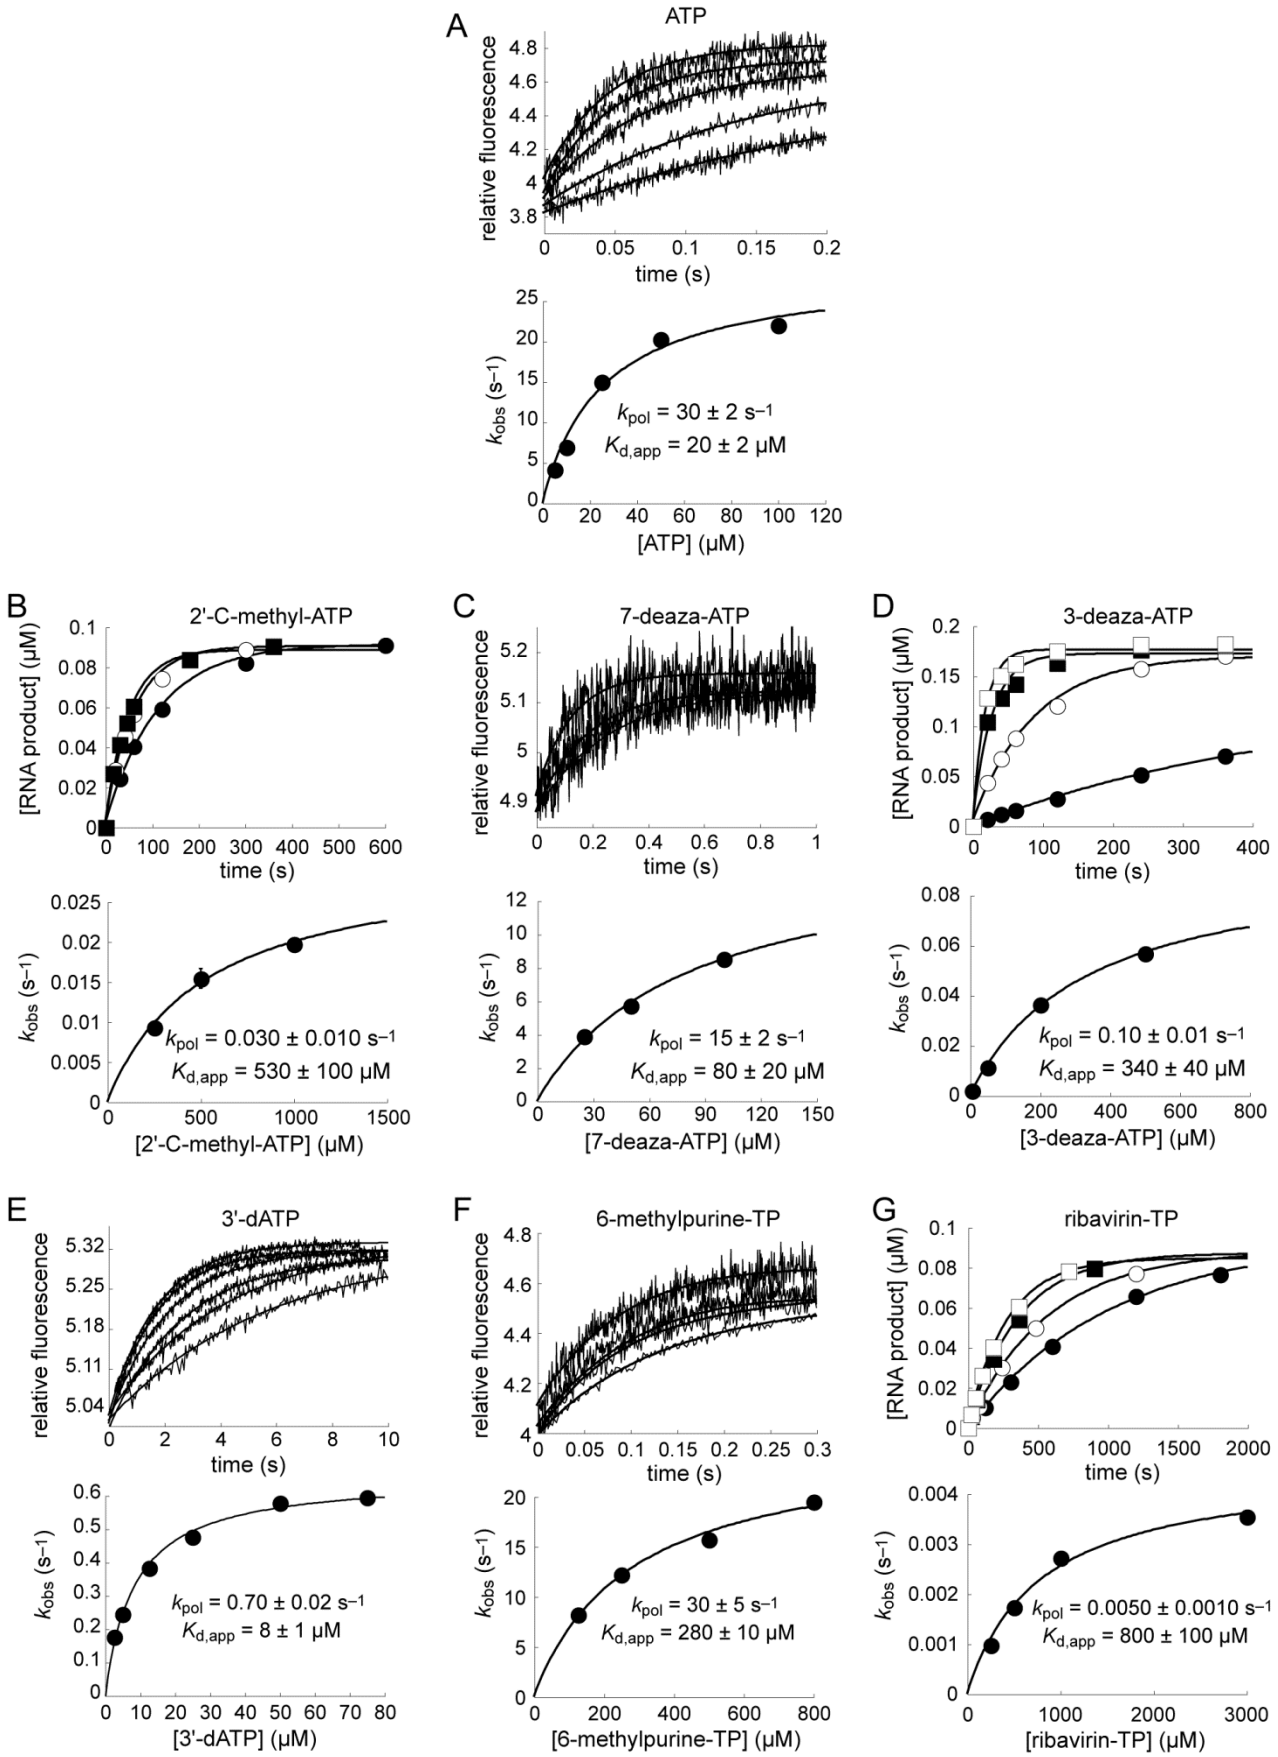

**Figure S1. Kinetic Parameters for POLRMT-Catalyzed Nucleotide Incorporation: Adenosine Analogs. (A)** Correct AMP incorporation. POLRMT (0.125  $\mu\text{M}$ ) was incubated with 8 bp 2AP scaffold (0.1  $\mu\text{M}$ ) for 3 min and then rapidly mixed with ATP (5, 10, 25, 50 or 100  $\mu\text{M}$ ) using a stopped-flow. The observed change in fluorescence emission was measured and fit to a single exponential (Eq. 1), yielding  $k_{\text{obs}}$  values of  $4 \pm 1$ ,  $7 \pm 1$ ,  $15 \pm 1$ ,  $20 \pm 1$  and  $22 \pm 1$   $\text{s}^{-1}$  for 5, 10, 25, 50 or 100  $\mu\text{M}$  ATP, respectively. Values for  $k_{\text{obs}}$  were plotted as a function of ATP concentration and fit to a hyperbola (Eq. 2), yielding a  $k_{\text{pol}}$  value of  $30 \pm 1$   $\text{s}^{-1}$  and a  $K_{\text{d,app}}$  value of  $20 \pm 2$   $\mu\text{M}$ . **(B)** 2'-C-methyl-AMP misincorporation. POLRMT (0.5  $\mu\text{M}$ ) was incubated with 5'-<sup>32</sup>P-labeled-RNA/DNA 8 bp scaffold (0.1  $\mu\text{M}$ ) for 3 min and then rapidly mixed with 2'-C-methyl-ATP (250, 500 or 1000  $\mu\text{M}$ ). Reactions were quenched at various times with EDTA (300 mM). Quantitated RNA product was plotted as a function of time and fit to a single exponential (Eq. 1) yielding values for  $k_{\text{obs}}$  of  $0.0093 \pm 0.0006$ ,  $0.015 \pm 0.001$  and  $0.019 \pm 0.001$   $\text{s}^{-1}$  for 250 (●), 500 (○) or 1000 (■)  $\mu\text{M}$  2'-C-methyl-ATP, respectively. Values for  $k_{\text{obs}}$  were plotted as a function of 2'-C-methyl-ATP concentration and fit to a hyperbola (Eq. 2), yielding a  $k_{\text{pol}}$  value of  $0.030 \pm 0.010$   $\text{s}^{-1}$  and a  $K_{\text{d,app}}$  value of  $530 \pm 100$   $\mu\text{M}$ . **(C)** 7-deaza-AMP misincorporation. POLRMT (0.25  $\mu\text{M}$ ) was incubated with 8 bp 2AP scaffold (0.125  $\mu\text{M}$ ) for 3 min and then rapidly mixed with 7-deaza-ATP (25, 50, or 100  $\mu\text{M}$ ) using a stopped-flow. The observed change in fluorescence emission was measured and fit to a single exponential (Eq. 1), yielding  $k_{\text{obs}}$  values of  $3.91 \pm 0.22$ ,  $5.56 \pm 0.26$ , and  $8.1 \pm 0.5$   $\text{s}^{-1}$  for 25, 50, or 100  $\mu\text{M}$  7-deaza-ATP, respectively. Values for  $k_{\text{obs}}$  were plotted as a function of 7-deaza-ATP concentration and fit to a hyperbola (Eq. 2), yielding a  $k_{\text{pol}}$  value of  $15 \pm 2$   $\text{s}^{-1}$  and a  $K_{\text{d,app}}$  value of  $80 \pm 20$   $\mu\text{M}$ . **(D)** 3-deaza-AMP misincorporation. POLRMT (0.5  $\mu\text{M}$ ) was incubated with 5'-<sup>32</sup>P-labeled-RNA/DNA 8 bp scaffold (0.1  $\mu\text{M}$ ) for 3 min and then rapidly mixed with 3-deaza-ATP (5, 50, 200 or 500  $\mu\text{M}$ ). Reactions were quenched at various times with EDTA (300 mM). Quantitated RNA product was plotted as a function of time and fit to a single exponential (Eq. 1) yielding values for  $k_{\text{obs}}$  of  $0.0020 \pm 0.0004$ ,  $0.011 \pm 0.001$ ,  $0.036 \pm 0.006$  and  $0.057 \pm 0.007$   $\text{s}^{-1}$  for 5 (●), 50 (○), 200 (■) or 500 (□)  $\mu\text{M}$  3-deaza-ATP, respectively. Values for  $k_{\text{obs}}$  were plotted as a function of 3-deaza-ATP concentration and fit to a hyperbola (Eq. 2), yielding a  $k_{\text{pol}}$  value of  $0.10 \pm 0.01$   $\text{s}^{-1}$  and a  $K_{\text{d,app}}$  value of  $340 \pm 40$   $\mu\text{M}$ . **(E)** 3'-dAMP misincorporation. POLRMT (0.25  $\mu\text{M}$ ) was incubated with 8 bp 2AP scaffold (0.125  $\mu\text{M}$ ) for 3 min and then rapidly mixed with 3'-dATP (2.5, 5, 12.5, 25, 50 or 75  $\mu\text{M}$ ) plus 1.25  $\mu\text{M}$  single-strand DNA trap using a stopped-flow apparatus. The observed change in fluorescence emission was measured and fit to a single exponential (Eq. 1), yielding  $k_{\text{obs}}$  values of  $0.18 \pm 0.01$ ,  $0.25 \pm 0.02$ ,  $0.38 \pm 0.03$ ,  $0.48 \pm 0.03$ ,  $0.58 \pm 0.04$  and  $0.60 \pm 0.04$   $\text{s}^{-1}$  for 2.5, 5, 12.5, 25, 50 or 75  $\mu\text{M}$  3'-dATP, respectively. Values for  $k_{\text{obs}}$  were plotted as a function of 3'-dATP concentration and fit to a hyperbola (Eq. 2), yielding a  $k_{\text{pol}}$  of  $0.70 \pm 0.02$   $\text{s}^{-1}$  and a  $K_{\text{d,app}}$  value of  $8 \pm 1$   $\mu\text{M}$ . **(F)** 6-methylpurine misincorporation. POLRMT (0.25  $\mu\text{M}$ ) was incubated with 8 bp 2AP scaffold (0.125  $\mu\text{M}$ ) for 3 min and then rapidly mixed with 6-methylpurine-TP (100, 250, 500 or 800  $\mu\text{M}$ ) using a stopped-flow. The observed change in fluorescence emission was measured and fit to a single exponential (Eq. 1), yielding  $k_{\text{obs}}$  values of  $8.2 \pm 0.2$ ,  $12.2 \pm 0.5$ ,  $15.7 \pm 0.5$  and  $19.5 \pm 0.5$   $\text{s}^{-1}$  for 100, 250, 500 or 800  $\mu\text{M}$  6-methylpurine-TP, respectively. Values for  $k_{\text{obs}}$  were plotted as a function of 6-methylpurine-TP concentration and fit to a hyperbola (Eq. 2), yielding a  $k_{\text{pol}}$  value of  $30 \pm 5$   $\text{s}^{-1}$  and a  $K_{\text{d,app}}$  value of  $280 \pm 10$   $\mu\text{M}$ . **(G)** ribavirin misincorporation. POLRMT (0.5  $\mu\text{M}$ ) was incubated with 5'-<sup>32</sup>P-labeled-RNA/DNA 8 bp scaffold (0.1  $\mu\text{M}$ ) for 3 min and then rapidly mixed with ribavirin-TP (250, 500, 1000 or 3000  $\mu\text{M}$ ). Reactions were quenched at various times with EDTA (300 mM). Quantitated RNA product was plotted as a function of time and fit to a single exponential (Eq. 1) yielding values for  $k_{\text{obs}}$  of  $0.00098 \pm 0.00006$ ,  $0.0017 \pm 0.0004$ ,  $0.0027 \pm 0.0001$  and  $0.0036 \pm 0.0001$   $\text{s}^{-1}$  for 250 (●), 500 (○), 1000 (■) or 3000 (□)  $\mu\text{M}$  ribavirin-TP, respectively. Values for  $k_{\text{obs}}$  were plotted as a function of ribavirin-TP concentration and fit to a hyperbola (Eq. 2), yielding a  $k_{\text{pol}}$  value of  $0.0050 \pm 0.0010$   $\text{s}^{-1}$  and a  $K_{\text{d,app}}$  value of  $800 \pm 100$   $\mu\text{M}$ .
